# Supplementary material for: Sexual Risk Behavior and Lifetime HIV Testing: The Role of Adverse Childhood Experiences
Source: MDPI journal article supplement (doi:10.3390/ijerph19074372), 2022-04-05
Supplement: s1 [file s1]

| <b>Supplement 1.</b> Unadjusted and adjusted prevalence ratios (and 95% confidence intervals) for the association between sexual and gender identity and self-reported HIV risk (n=58,077)                   |                          |                          |
|--------------------------------------------------------------------------------------------------------------------------------------------------------------------------------------------------------------|--------------------------|--------------------------|
|                                                                                                                                                                                                              | <b>Unadjusted</b>        | Adjusted*                |
| <b>Sexual and Gender Identity</b>                                                                                                                                                                            |                          |                          |
| Cisgender Bisexual Women                                                                                                                                                                                     | <b>3.24 (2.43, 4.32)</b> | 1.05 (0.82, 1.34)        |
| Cisgender Bisexual Men                                                                                                                                                                                       | <b>3.49 (2.39, 5.07)</b> | 1.46 (0.96, 2.21)        |
| Cisgender Gay Women                                                                                                                                                                                          | 0.84 (0.37, 1.94)        | 0.41 (0.25, 1.02)        |
| Cisgender Gay Men                                                                                                                                                                                            | <b>5.86 (4.49, 7.64)</b> | <b>2.92 (2.21, 3.85)</b> |
| Cisgender Heterosexual Women                                                                                                                                                                                 | <b>0.59 (0.50, 0.69)</b> | <b>0.62 (0.52, 0.73)</b> |
| Cisgender Heterosexual Men                                                                                                                                                                                   | <b>Reference</b>         | <b>Reference</b>         |
| Cisgender Other Sexual Identity Women                                                                                                                                                                        | 1.40 (0.70, 2.80)        | 0.84 (0.40, 1.75)        |
| Cisgender Other Sexual Identity Men                                                                                                                                                                          | 1.53 (0.84, 2.80)        | 0.89 (0.49, 1.58)        |
| Cisgender Questioning Women                                                                                                                                                                                  | 0.77 (0.23, 2.55)        | 1.19 (0.34, 4.15)        |
| Non-Binary                                                                                                                                                                                                   | 0.69 (0.22, 2.18)        | 0.66 (0.23, 1.89)        |
| Transgender Women                                                                                                                                                                                            | 2.58 (0.96, 6.94)        | 1.20 (0.57, 2.51)        |
| Transgender Men                                                                                                                                                                                              | 1.72 (0.42, 7.00)        | 1.09 (0.33, 3.62)        |
| Adjusted for the ACEs index, income, age, highest education level, race/ethnicity, depression, and binge drinking. Cisgender questioning men not included in analyses due to variance inflation limitations. |                          |                          |
